# Supplementary material for: tRNA methylation resolves codon usage bias at the limit of cell viability
Source: PubMed Central journal article supplement — Cell Rep. Author manuscript; Available in PMC 2022 Nov 9. (PMC9643105; doi:10.1016/j.celrep.2022.111539), 2022-10-25
Supplement: NIHMS1845183-supplement-1.pdf [file NIHMS1845183-supplement-1.pdf]

**Cell Reports, Volume 41**

**Supplemental information**

**tRNA methylation resolves codon usage bias  
at the limit of cell viability**

**Isao Masuda, Yuka Yamaki, Rajesh Detroja, Somnath Tagore, Henry Moore, Sunita Maharjan, Yuko Nakano, Thomas Christian, Ryuma Matsubara, Todd M. Lowe, Milana Frenkel-Morgenstern, and Ya-Ming Hou**

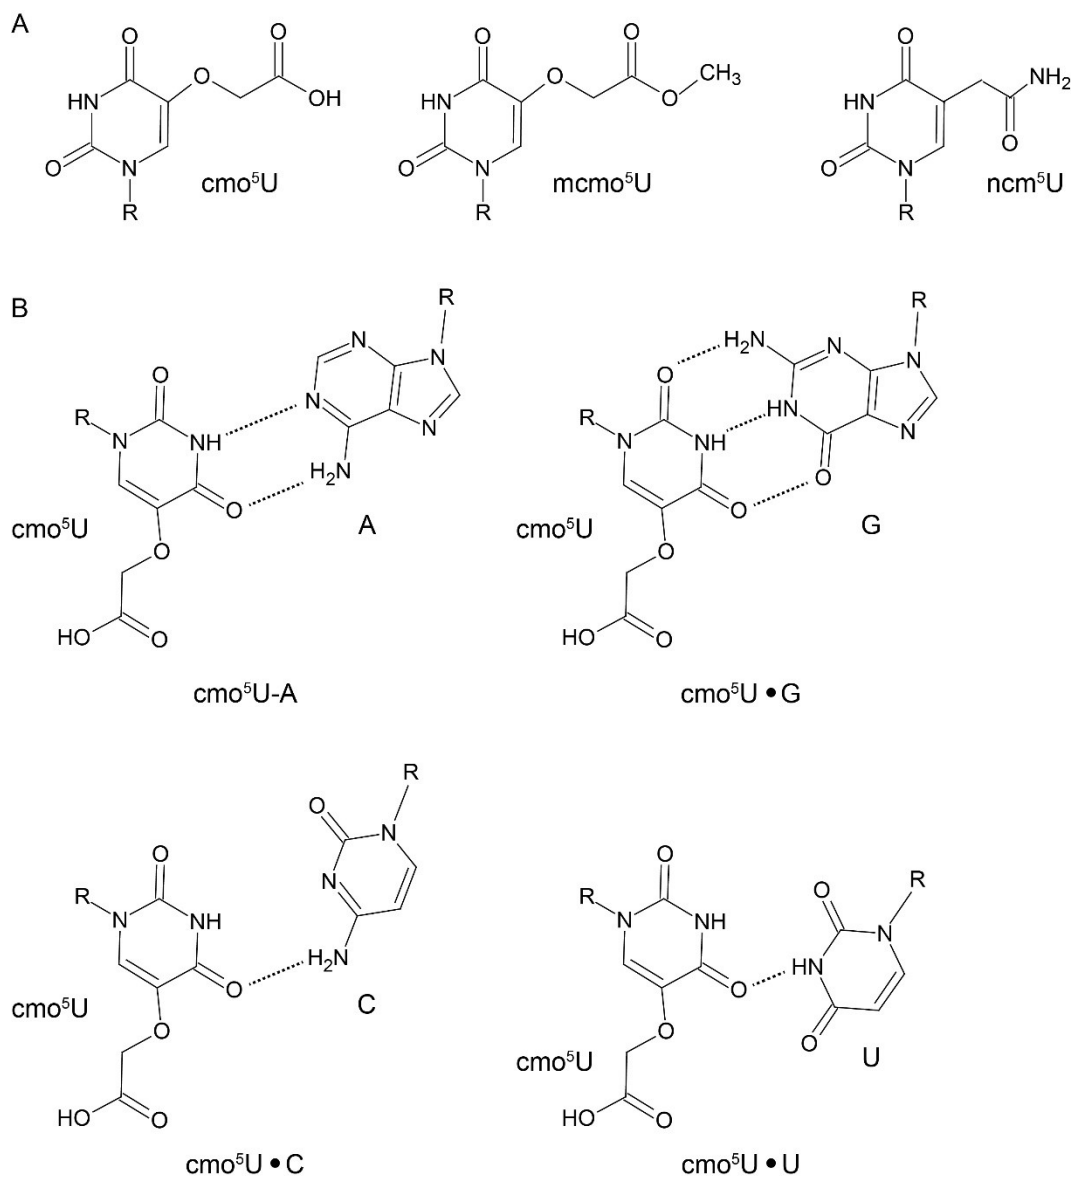

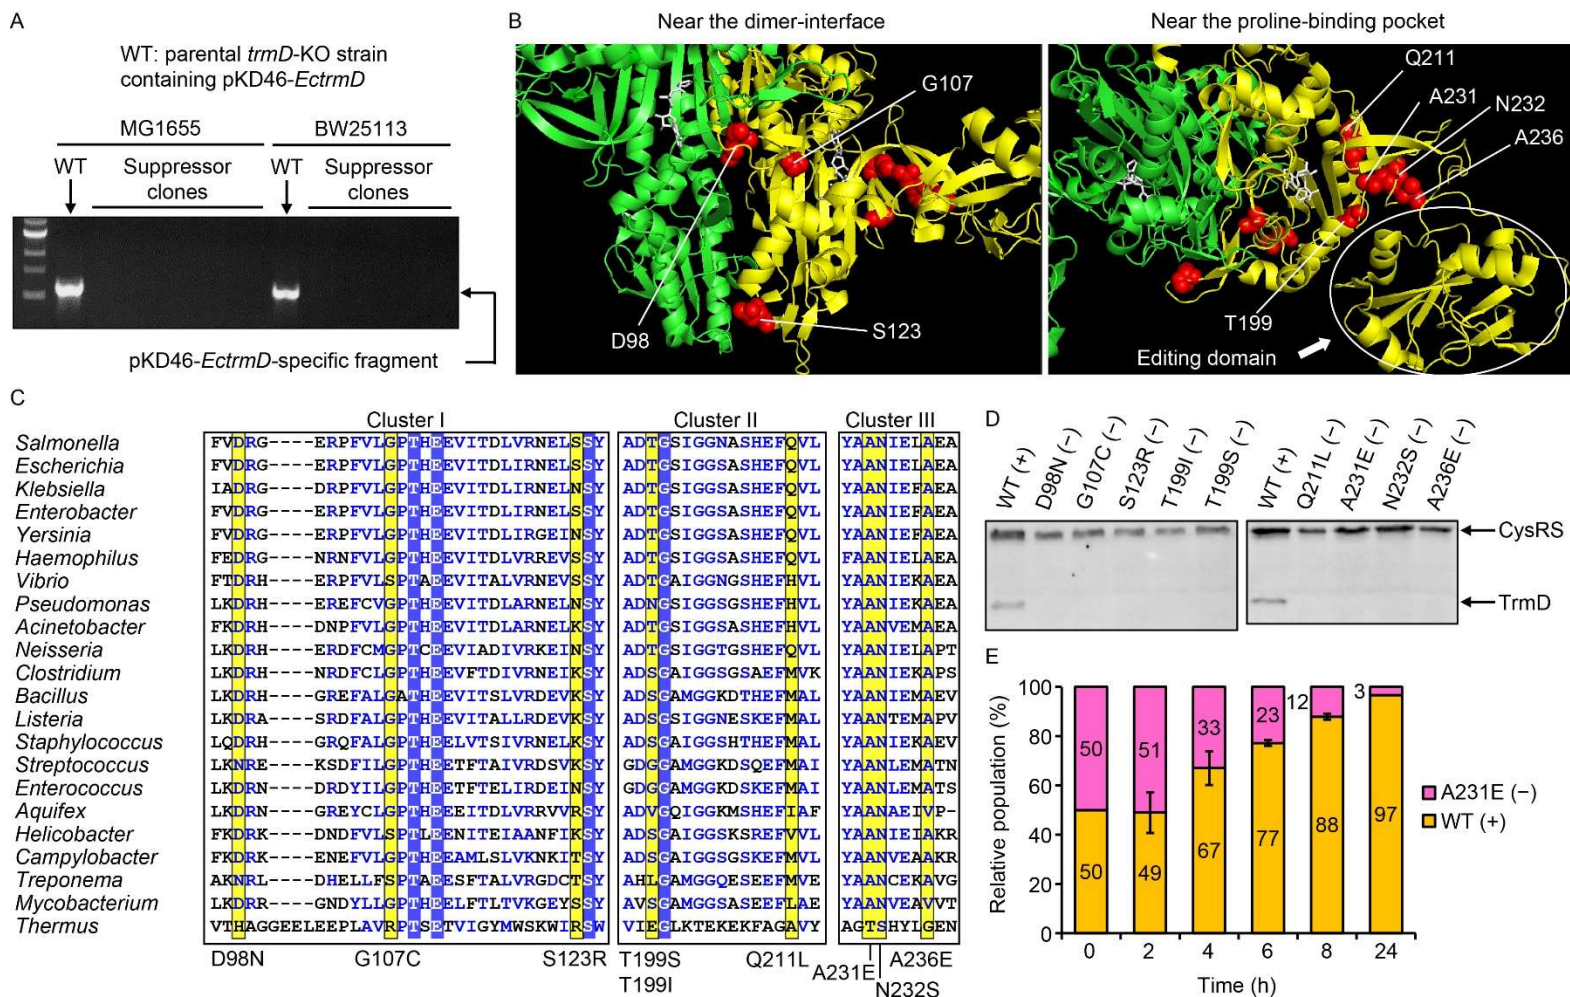

**Figure S2 (Related to Figures 1 and 2).** The isolated *proS* suppressor mutants are viable without *trmD* but less fit than the WT expressing *trmD*.

**(A)** Absence of the pKD46-*EctrmD* maintenance plasmid from suppressors with the *trmD*-KO allele. Suppressors were analyzed for the 5 colonies isolated from MG1655 and the 4 colonies isolated from BW25113. Absence of the plasmid was analyzed by PCR using primers specific to pKD46-*EctrmD*. The WT sample was isolated from the parental strain containing pKD46-*EctrmD*. **(B)** Mapping of *proS* suppressor mutations to the structure of *E. faecalis proS* enzyme as in Figure 1D. The images are blown up for Cluster I mutations near the monomer-monomer interphase (left) and for Clusters II and III mutations near the proline-binding pocket adjacent to the proof-reading domain (right). **(C)** A multi-sequence alignment of the ProRS enzyme as in Figure 1E, with an expanded set of species. **(D)** Absence of TrmD in the reconstructed *proS* suppressors in Western blots. Whole-cell lysates of early-log phase cultures were run on a 10% SDS-PAGE gel. Proteins transferred to a PVDF membrane were probed by anti-TrmD and anti-CysRS antibodies. **(E)** The *proS*-A231E (-) suppressor is out-competed by the WT (+) strain in a cell fitness assay as in Figure 2C. The bar graph shows the relative abundance of the two strains in a 1:1 mixture over the time course of 24 h.

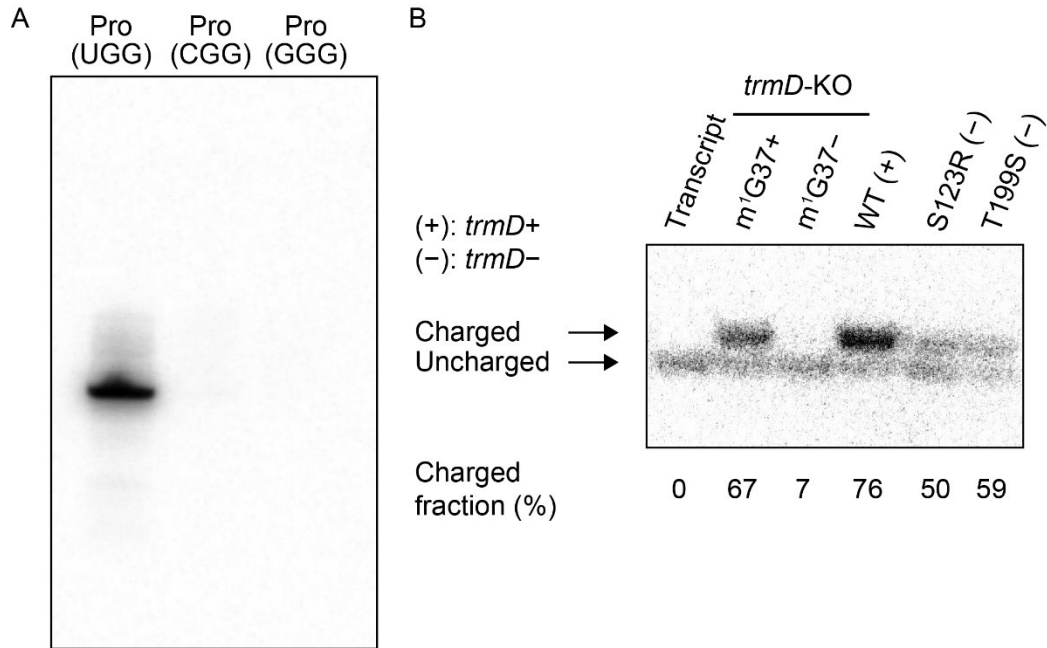

**Figure S3 (Related to Figure 3). Acid-urea denaturing gel analysis of charged and uncharged Pro(UGG).**

**(A)** Northern blot analysis showing that the probe for *E. coli* Pro(UGG) is specific to the tRNA and does not hybridize to the other two isoacceptors Pro(CGG) and Pro(GGG). Each tRNA in this analysis is an unmodified transcript, run on a 12% PAGE/7M urea gel, and probed with the [<sup>32</sup>P]-labeled probe. **(B)** Acid-urea gel analysis of the *proS* suppressors S123R (-) and T199S (-), showing prolyl-aminoacylation level of 50% and 59%, respectively. An uncharged transcript of Pro(UGG) is shown in lane 1, and a positive control sample from an MG1655 *trmD*-KO strain expressing a plasmid-borne *trmD* grown in the Ara (+) condition and a negative control collected in the Ara (-) condition are shown in lanes 2 and 3. The sample from the WT MG1655 is shown in lane 4.

A Pro(UGG)

| ProRS | State of G37       | $K_m$ ( $\mu\text{M}$ ) | $k_{\text{cat}}$ ( $\text{s}^{-1}$ ) | $k_{\text{cat}} / K_m$ ( $\mu\text{M}^{-1}\text{s}^{-1}$ ) | Fold change in $k_{\text{cat}} / K_m$ Relative to G37-state |
|-------|--------------------|-------------------------|--------------------------------------|------------------------------------------------------------|-------------------------------------------------------------|
| WT    | m <sup>1</sup> G37 | 0.96 ± 0.15             | 4.92 ± 0.78                          | 5.14 ± 0.09                                                | 20.7                                                        |
|       | G37                | 11.8 ± 2.24             | 2.91 ± 1.71                          | 0.25 ± 0.12                                                | 1.0                                                         |
| D98N  | m <sup>1</sup> G37 | 0.29 ± 0.08             | 0.04 ± 0.003                         | 0.13 ± 0.03                                                | 2.9                                                         |
|       | G37                | 1.59 ± 0.41             | 0.07 ± 0.005                         | 0.05 ± 0.1                                                 | 1.0                                                         |
| T199I | m <sup>1</sup> G37 | 0.61 ± 0.19             | 0.02 ± 0.007                         | 0.03 ± 0.003                                               | 3.0                                                         |
|       | G37                | 4.50 ± 1.90             | 0.05 ± 0.03                          | 0.01 ± 0.006                                               | 1.0                                                         |
| N232S | m <sup>1</sup> G37 | 0.25 ± 0.04             | 0.03 ± 0.01                          | 0.13 ± 0.05                                                | 2.5                                                         |
|       | G37                | 1.71 ± 0.88             | 0.07 ± 0.005                         | 0.05 ± 0.03                                                | 1.0                                                         |

B Pro(GGG)

| ProRS | State of G37       | $K_m$ ( $\mu\text{M}$ ) | $k_{\text{cat}}$ ( $\text{s}^{-1}$ ) | $k_{\text{cat}} / K_m$ ( $\mu\text{M}^{-1}\text{s}^{-1}$ ) | Fold change in $k_{\text{cat}} / K_m$ Relative to G37-state |
|-------|--------------------|-------------------------|--------------------------------------|------------------------------------------------------------|-------------------------------------------------------------|
| WT    | m <sup>1</sup> G37 | 0.70 ± 0.25             | 1.97 ± 0.62                          | 3.12 ± 1.14                                                | 20.5                                                        |
|       | G37                | 9.10 ± 2.97             | 1.28 ± 0.19                          | 0.15 ± 0.03                                                | 1.0                                                         |
| D98N  | m <sup>1</sup> G37 | 0.26 ± 0.08             | 0.04 ± 0.007                         | 0.14 ± 0.04                                                | 4.4                                                         |
|       | G37                | 2.15 ± 0.47             | 0.07 ± 0.007                         | 0.03 ± 0.008                                               | 1.0                                                         |

C Pro(CG G)

| ProRS | State of G37       | $K_m$ ( $\mu\text{M}$ ) | $k_{\text{cat}}$ ( $\text{s}^{-1}$ ) | $k_{\text{cat}} / K_m$ ( $\mu\text{M}^{-1}\text{s}^{-1}$ ) | Fold change in $k_{\text{cat}} / K_m$ Relative to G37-state |
|-------|--------------------|-------------------------|--------------------------------------|------------------------------------------------------------|-------------------------------------------------------------|
| WT    | m <sup>1</sup> G37 | 8.33 ± 3.27             | 3.59 ± 1.15                          | 0.45 ± 0.14                                                | 18.8                                                        |
|       | G37                | 14.8 ± 1.27             | 0.35 ± 0.07                          | 0.02 ± 0.005                                               | 1.0                                                         |
| D98N  | m <sup>1</sup> G37 | 0.53 ± 0.29             | 0.02 ± 0.003                         | 0.07 ± 0.05                                                | 3.4                                                         |
|       | G37                | 4.71 ± 0.47             | 0.10 ± 0.03                          | 0.02 ± 0.006                                               | 1.0                                                         |

**Figure S4 (Related to Figure 3). Kinetic parameters of prolyl-aminoacylation.**

(A) Kinetic parameters of prolyl-aminoacylation of Pro(UGG) shown in Figure 3B. For each enzyme,  $K_m$  ( $\mu\text{M}$ ) for the tRNA substrate,  $k_{\text{cat}}$  ( $\text{s}^{-1}$ ),  $k_{\text{cat}}/K_m$  ( $\mu\text{M}^{-1}\text{s}^{-1}$ ), and the fold-change of  $k_{\text{cat}}/K_m$  of the G37-state relative to the m<sup>1</sup>G37-state are shown. (B) Kinetic parameters of prolyl-aminoacylation of Pro(GGG) shown in Figure 3C. (C) Kinetic parameters of prolyl-aminoacylation of Pro(CG G) shown in Figure 3D.

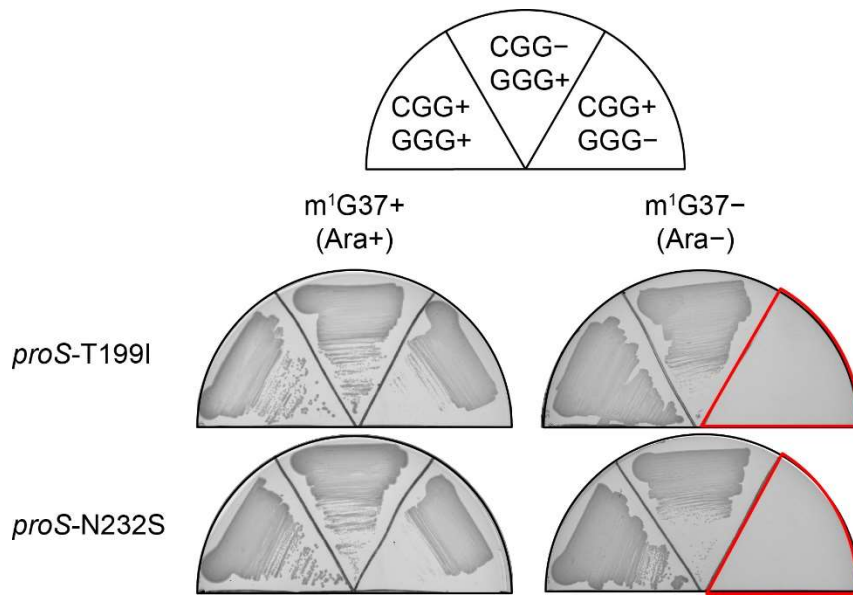

**Figure S5 (Related to Figure 4). Requirement of Pro(GGG) for cell viability of *proS-T199I* and *proS-N232S* mutants in m<sup>1</sup>G37- condition.**

Pro(CGG) or Pro(GGG) was removed from *proS-T199I* and *proS-N232S* mutants lacking *trmD* and cells were grown in m<sup>1</sup>G37+ or m<sup>1</sup>G37- condition as in Figure 4C. No growth was observed when both m<sup>1</sup>G37 and Pro(GGG) were absent.

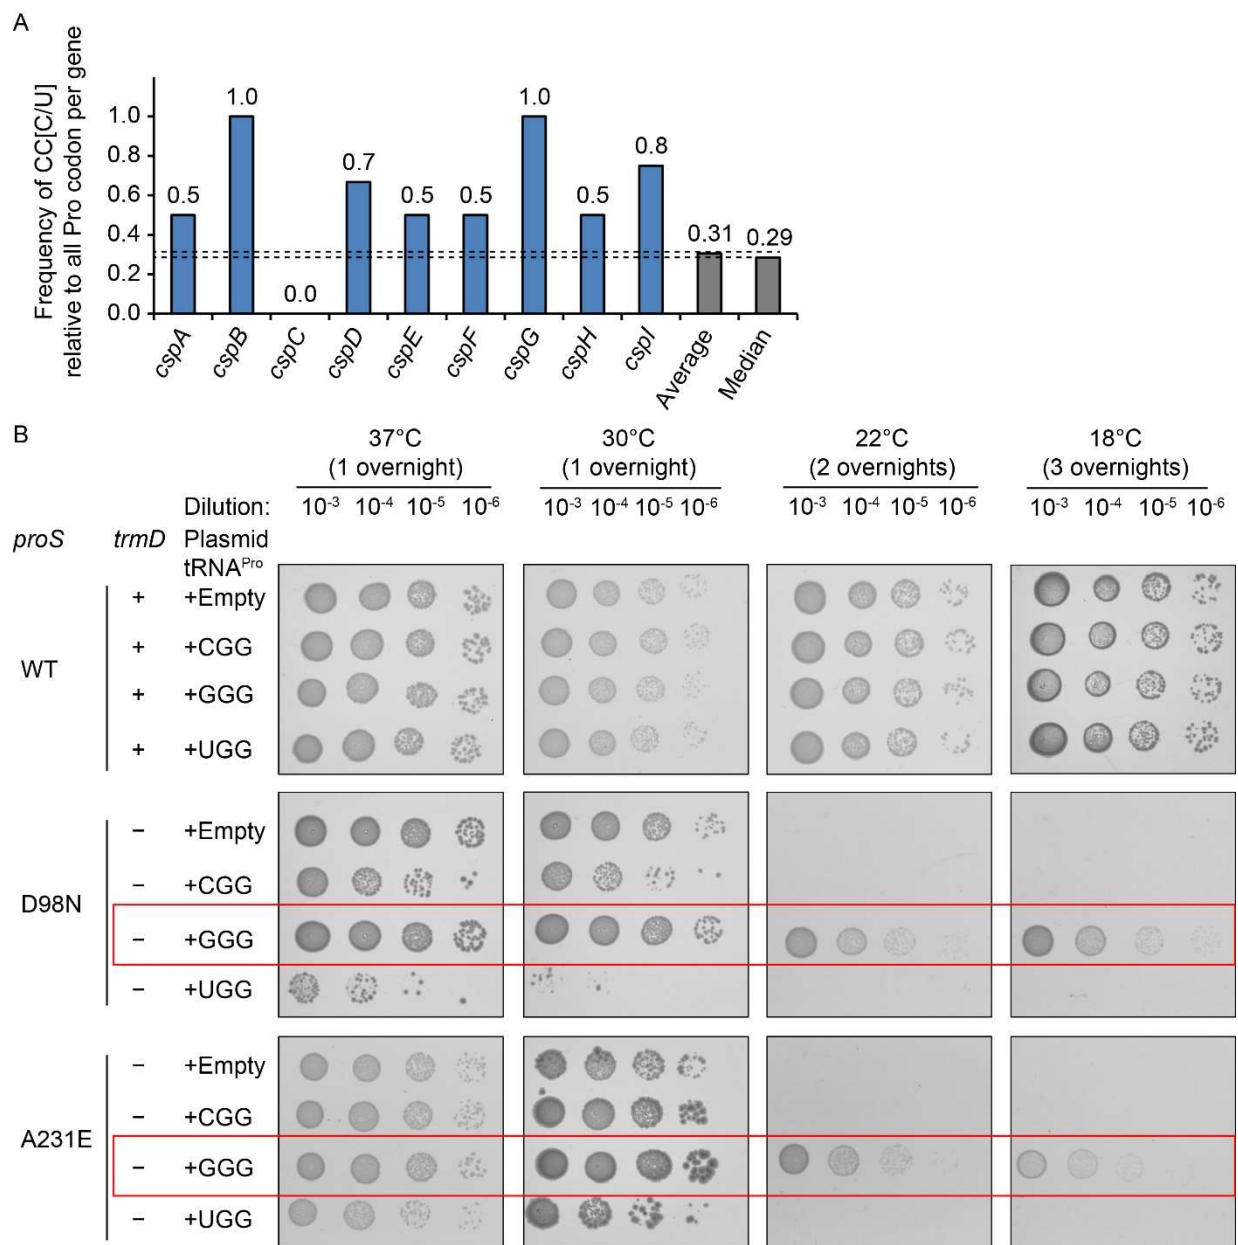

**Figure S6 (Related to Figure 5). High frequency of CC[C/U] codons in *E. coli* *csp* genes.**

**(A)** The frequencies of CC[C/U] codons are shown for selected *csp* genes, showing higher frequencies than the average and median (0.31 and 0.29, respectively) for most of these genes. **(B)** Rescue of cold sensitivity by expression of Pro(GGG) in *proS*-D98N and *proS*-A231E suppressors as in Figure 5D. The *proS*-A231E mutant was incubated at 30°C for 2 overnights due to a slower growth phenotype.

|          |     | Pro(GGG) |     |
|----------|-----|----------|-----|
|          |     | Yes      | No  |
| Pro(CGG) | Yes | 936      | 44  |
|          | No  | 256      | 362 |

**Figure S7 (Related to Figure 6). Co-occurrence of Pro(GGG) and Pro(CGG) across bacterial species.**

Heat-map table showing the number of co-occurrence of Pro(GGG) and Pro(CGG) across all bacterial species that are available in GtRNAdb. Counts are species within GtRNAdb beyond the curated set used in Figure 6A. The greatest majority of bacterial species have both Pro(GGG) and Pro(CGG), followed by a majority lacking both tRNAs, whereas few have Pro(CGG) but lack Pro(GGG).



**Table S1 (Related to Figure 1). Comparison between this study by Masuda *et al.* and the study by Clifton *et al.* (Clifton *et al.*, 2021).**

|                                                         | Masuda <i>et al.</i> (2022)                                | Clifton <i>et al.</i> (2021) |                                                                        |                                                   |                            |                                                                           |                            |                                                                                                                                    |                           |                           |                            |
|---------------------------------------------------------|------------------------------------------------------------|------------------------------|------------------------------------------------------------------------|---------------------------------------------------|----------------------------|---------------------------------------------------------------------------|----------------------------|------------------------------------------------------------------------------------------------------------------------------------|---------------------------|---------------------------|----------------------------|
| Chromosomal <i>trmD</i>                                 | KO                                                         | Y86*                         | R154A                                                                  | S165L                                             | G117N                      | R154A                                                                     | S165L                      | Y86*                                                                                                                               | Y115A                     | G141A                     | D169A                      |
| Mutation description                                    | Complete deletion                                          | Y86 changed to a stop codon  | Activity largely abolished                                             | Colony size reduced by 90%                        | Colony size reduced by 90% | Activity largely abolished                                                | Colony size reduced by 90% | Y86 changes to a stop codon                                                                                                        | Catalytically compromised | Catalytically compromised | Activity largely abolished |
| Level of growth defect                                  | Severe                                                     | Severe                       |                                                                        |                                                   | Intermediate               | Severe                                                                    |                            | Severe                                                                                                                             | Little                    | Little                    | Severe                     |
| Growth condition                                        | LB, 43°C                                                   | LB, 37°C                     |                                                                        |                                                   |                            |                                                                           |                            |                                                                                                                                    |                           |                           |                            |
| Days of cell culture                                    | 2 to 3                                                     | 9                            |                                                                        |                                                   | 15                         | 22                                                                        |                            | 30                                                                                                                                 | –                         | –                         | –                          |
| <i>proS</i> mutations                                   | D98N G107C S123R<br>T199I T199S Q211L<br>A231E N232S A236E | A231E                        | E19K<br>A36V<br>Y89N<br>G107C<br>G200S<br>A231E<br>E514V               | D98N<br>G200S<br>G200A<br>A231E<br>L235Q<br>M441I |                            | E19K<br>G200S<br>A231E<br>E514V                                           | G200S<br>E514K             | V195L<br>G200A<br>A231E                                                                                                            |                           |                           |                            |
| <i>trmD</i> coding region mutation (Yes or No)          | N.A.                                                       | Yes                          | Yes                                                                    | Yes                                               | Yes                        | Yes                                                                       | Yes                        | Yes                                                                                                                                |                           |                           | Yes (A169E)                |
| <i>rimM-trmD</i> intergenic region mutation (Yes or No) | N.A.                                                       |                              |                                                                        | Yes                                               | Yes                        |                                                                           | Yes                        |                                                                                                                                    |                           |                           |                            |
| tRNA <sup>Arg</sup> gene mutations                      |                                                            |                              |                                                                        |                                                   |                            | <i>argQ</i><br><i>argW</i><br><i>argY</i><br><i>argZ</i>                  | <i>argV</i>                | <i>argQ</i><br><i>argV</i><br><i>argY</i><br><i>argZ</i>                                                                           |                           |                           |                            |
| Other gene mutations including intergenic region        |                                                            |                              | <i>acrD</i><br><i>fecA</i><br><i>cfa</i><br><i>nirB</i><br><i>ulaG</i> |                                                   |                            | <i>spoT</i><br><i>yfbM-yfbN</i> intergenic<br><i>yifK-argX</i> intergenic |                            | <i>insH1</i> intergenic<br><i>lrhA-alaA</i> intergenic<br><i>rpoC</i><br><i>spoT</i><br><i>yifK-argX</i> intergenic<br><i>ytfK</i> |                           |                           |                            |

Shown in red are *proS* suppressor mutations in common between the two studies.

**Table S2 (Related to STAR Methods). Primers used in this study.**

| Category               | Sequence (5'-3')                                                                           | Purpose                                                                  |
|------------------------|--------------------------------------------------------------------------------------------|--------------------------------------------------------------------------|
| Gene knockout          |                                                                                            |                                                                          |
| <i>E. coli proK-KO</i> | AGGGCGTATCTGCGCAGTAAGATGCGCCCCGCATT<br>GTGTAGGCTGGAGCTGCTTC                                | Forward to amplify <i>Kan</i> from pKD4 with homologous extension        |
|                        | AAAAAGCCTGCTCGTTGAGCAGGCTTTTCGAATTAT<br>GGGAATTAGCCATGGTCC                                 | Reverse to amplify <i>Kan</i> from pKD4 with homologous extension        |
| CRISPR mutation        |                                                                                            |                                                                          |
| <i>E. coli proS</i>    | GTGCTCAGTATCTCTATCACTGA                                                                    | Reverse to amplify pKDsgRNA                                              |
|                        | CTGCTGCGTTTTGTTGACCGGTTTTAGAGCTAGAAA<br>TAGCAAG                                            | Forward to amplify pKDsgRNA for D98N                                     |
|                        | TGAGTTGGGCCGAGTACGAAGTTTTAGAGCTAGAA<br>ATAGCAAG                                            | Forward to amplify pKDsgRNA for G107C                                    |
|                        | AGCTAAGCTCGTTACGAATCGTTTTAGAGCTAGAAA<br>TAGCAAG                                            | Forward to amplify pKDsgRNA for creating a new PAM site to make S123R    |
|                        | TGTAAGAGCTAAGCTCGTTAGTTTTAGAGCTAGAAA<br>TAGCAAG                                            | Forward to amplify pKDsgRNA for S123R                                    |
|                        | CAAGCCGACACCGGTTCTATGTTTTAGAGCTAGAA<br>ATAGCAAG                                            | Forward to amplify pKDsgRNA for T199I and T199S                          |
|                        | CTCTCACGAATTCAGGTGCGTTTTAGAGCTAGAAA<br>TAGCAAG                                             | Forward to amplify pKDsgRNA for Q211L                                    |
|                        | CTATGCAGCGAACATTGAACGTTTTAGAGCTAGAAA<br>TAGCAAG                                            | Forward to amplify pKDsgRNA for A231E and N232S                          |
|                        | CTATGCAGCGAACATTGAACGTTTTAGAGCTAGAAA<br>TAGCAAG                                            | Forward to amplify pKDsgRNA for creating a new PAM site for making A236E |
|                        | AGCTTCTGCCAGTTCAATATGTTTTAGAGCTAGAAA<br>TAGCAAG                                            | Forward to amplify pKDsgRNA or A236E                                     |
|                        | GGGAACAGTACGGTCCGGAAGTCTGCGTTTTGTG<br>AATCGTGCGAGCGTCCGTTCTACTCGGCCCAAC<br>TCATGAAGAA      | Mutation donor for making D98N                                           |
|                        | CTGCGTTTTGTTGACCGTGGCGAGCGTCCGTTTCGT<br>ACTGTGTCCAACCTCATGAAGAAGTTATCACTGACCT<br>GATTCGTAA | Mutation donor for making G107C                                          |
|                        | GTAAGGCGCCCAACTCATGAAGAAGTTATCACTGA<br>CCTTATCCGTAACGAGCTTAGCTCTTACAAACAGCT<br>GCCGCTGAA   | Mutation donor for making a new PAM site for making S123R                |
|                        | CTCATGAAGAAGTTATCACTGACCTTATCCGTAACG<br>AGTTGCGCTCTTACAAACAGCTGCCGCTGAACTTC<br>TATCAGATC   | Mutation donor for making S123R                                          |
|                        | CCGCATGGGGCTGGATTTCCGCGCCGTACAAGCC<br>GATATTGGTTCTATCGGCGCAGCGCCTCTCACGA<br>ATTCCAGGTGC    | Mutation donor for making T199I                                          |
|                        | CCGCATGGGGCTGGATTTCCGCGCCGTACAAGCC<br>GATTTCTGTTCTATCGGCGCAGCGCCTCTCACGA<br>ATTCCAGGTGC    | Mutation donor for making T199S                                          |
|                        | CAAGCCGACACCGGTTCTATCGGCGCAGCGCCT<br>CTCACGAATTTCTTGCTGGCGCAGAGCGGTGAA<br>GACGATGTGGT      | Mutation donor for making Q211L                                          |
|                        | GACGATGTGGTCTTCTCCGACACCTCTGACTATGC<br>AGAAAATATTGAACTGGCAGAAGCTATCGCGCCGA<br>AAGAACC GCG  | Mutation donor for making A231E                                          |

|                                |                                                                                          |                                                                         |
|--------------------------------|------------------------------------------------------------------------------------------|-------------------------------------------------------------------------|
|                                | GACGATGTGGTCTTCTCCGACACCTCTGACTATGC<br>AGCCAGTATTGAACTGGCAGAAGCTATCGCGCCGA<br>AAGAACCGCG | Mutation donor for making N232S                                         |
|                                | GACGATGTGGTCTTCTCCGACACCTCTGACTATGC<br>AGCCAATATTGAACTGGCAGAAGCTATCGCGCCGA<br>AAGAACCGCG | Mutation donor for making a new<br>PAM site for making A236E            |
|                                | TCTCCGACACCTCTGACTATGCAGCCAATATTGAAT<br>TAGAAGAAGCTATCGCGCCGAAAGAACCGCGCGCT<br>GCTGCTACC | Mutation donor for making A236E                                         |
| Probe for Northern blotting    |                                                                                          |                                                                         |
| <i>E. coli</i> Pro(UGG) tRNA   | CCAAACCAGTTGCGCTACCA                                                                     | Annealing to the tRNA region from the D-loop to the anticodon stem-loop |
| Plasmid construction           |                                                                                          |                                                                         |
| pKD46- <i>EctrmD</i>           | GCCATTCTCGAGAATGGCGATGACGCATCCTCAC                                                       | Forward to amplify pKD46 with an XhoI site                              |
|                                | AAGCGTCAGGTAGGATCCGCTAATCTTATGG                                                          | Reverse to amplify pKD46 with a BamHI site                              |
| pET22b- <i>EcproS</i> mutant   | AAGGAGATATACATATGCGTACTAGCCAATACCTGCTCTC                                                 | Forward to amplify <i>proS</i> with an NdeI site                        |
|                                | GGTGGTGGTGCTCGAGGCCTTAATCTGTTTCACCAGATAT                                                 | Reverse to amplify <i>proS</i> with an XhoI site                        |
| pKK223-3- <i>proK</i>          | TCACCGGAATTCGGGTGATTGGCGCAGCCTGGTAGCGCACTTCGTTCCGGGACGAAG                                | Forward to construct <i>proK</i> with EcoRI site                        |
|                                | CGACCACTGCAGTGGTCCGGTATAGAGGATTCGAACTCCGACCCCTTCGTCCCGAACGAAG                            | Reverse to construct <i>proK</i> with PstI site                         |
| pKK223-3-N-luc                 | AAGCTTGGCTGTTTTGGCGGATG                                                                  | Forward to amplify the pKK223-3 backbone                                |
|                                | GAATTCTGTTTCCTGTGTGAAATTGTTATC                                                           | Reverse to amplify the pKK223-3 backbone                                |
|                                | CACACAGGAAACAGAATTCATGCCCGGTGTCTTCACTCGAAGATTTTCG                                        | Forward to amplify nLuc with a CCC at the second codon position         |
|                                | CACACAGGAAACAGAATTCATGCCCGGTGTCTTCACTCGAAGATTTTCG                                        | Forward to amplify nLuc with a CCC-C codon at the second position       |
|                                | CGCCAAAACAGCCAAGCTTTTACGCCAGAATGCGTTCGCACAGC                                             | Reverse to amplify nLuc                                                 |
| Confirmation of plasmid curing |                                                                                          |                                                                         |
| pKD46- <i>EctrmD</i>           | CATATTGCATCAGACATTGCCG                                                                   | Forward to amplify a partial fragment of pKD46- <i>EctrmD</i>           |
|                                | CTATGTGCCATCTCGATACTCG                                                                   | Reverse to amplify a partial fragment of pKD46- <i>EctrmD</i>           |
